# Supplementary material
Source: HighWire-hosted journal article supplement (https://svn.smart01.highwire.org/content/5/3/285)
Supplement: inline-supplementary-material-3 [file inline-supplementary-material-3.pdf]

Supplementary Table III sICH in patients with or without anticoagulation therapy

| Anticoagulation<br>(Heparin or Low Molecule Weight Heparin) | Patients<br>N (%) | sICH<br>n (%) |
|-------------------------------------------------------------|-------------------|---------------|
| Anticoagulation (Yes)                                       | 30 (25.0%)        | 0 (0.0%)      |
| began <24 hours after tPA                                   | 0 (0.0%)          | -             |
| began ≥24 hours after tPA                                   | 30 (25.0%)        | -             |
| Anticoagulation (No)                                        | 90 (75.0%)        | 3 (3.3%)      |

sICH, symptomatic intracerebral hemorrhage
